# Supplementary material for: Usefulness of the modified hemophagocytic syndrome diagnostic score as a prognostic factor in lung transplantation patients
Source: Research Square preprint supplement (doi:10.21203/rs.3.rs-1151209/v1), 2021-12-13
Supplement: Supplementary file 1 [file 15d4c0a035b89fc58a55b098.docx]

**Supplemental Table 1. Parameters and criteria for scoring consisting of the mHScore [17].**

| **Parameters** | **No. of points (criteria for scoring)** |
| --- | --- |
| No. of cytopenias* | 0 (1 lineage), 24 (2 lineages), or 34 (3 lineages) |
| Ferritin (ng/ml) | 0 (< 2,000), 35 (2,000‒6,000), or 50 (> 6,000) |
| Triglyceride (mmol/l) | 0 (<1.5), 44 (1.5‒4), or 64 (> 4) |
| Fibrinogen (g/l) | 0 (> 2.5) or 30 (≤ 2.5) |
| Serum glutamic oxaloacetic transaminase (IU/l) | 0 (< 30) or 19 (≥ 30) |

*Defined as a hemoglobin level of ≤ 9.2 gm/dl and/or a leukocyte count of ≤5,000/mm3 and/or a platelet count of 110,000/mm3.
